# Supplementary material for: Octahedral ruthenium (II) polypyridyl complexes as antimicrobial agents against mycobacterium
Source: PeerJ. 2017 Apr 27;5:e3252. doi: 10.7717/peerj.3252 (PMC5410163; doi:10.7717/peerj.3252)
Supplement: Supplemental Information 2 [file peerj-05-3252-s002.xls]

## Sheet: Sheet1
MIC of complex 1,2 and 3
concentration(ug/ml)	E.coli	P.aeruginosa PA01	S.aures ATCC33591	S.aures ATCC25129
complex1	>64	>64	>64	>64
complex2	>64	>64	>64	>64
complex3	>64	>64	>64	>64
